# Supplementary material
Source: PubMed Central journal article supplement (PMC3101004)
Supplement: supp_111.180208_JPET180208_Table_2.pdf [file supp_111.180208_JPET180208_Table_2.pdf]

## Supplemental Data for:

- Previous exposure to  $\Delta^9$ -THC enhances locomotor responding to but not self-administration of amphetamine
- James J. Cortright, Daniel S. Lorrain, Jeff A. Beeler, Wei-Jen Tang, Paul Vezina
- The Journal of Pharmacology and Experimental Therapeutics

### ANOVA Results for Table 2

For each behavior in each epoch, a between-within ANOVA was conducted with dose (6) as the between factor and day (2) as the within factor. F ratios and statistical significance level achieved are listed for each factor and for the dose X day interaction. Statistical analyses were conducted according to Kirk (1968).

#### **Epoch 1 (0-30 minutes).**

|            |                                                                                                                  |
|------------|------------------------------------------------------------------------------------------------------------------|
| Sniffing   | dose: $F_{5,18}=1.04$ , NS<br>day: $F_{1,18}=18.53$ , $p<0.001$<br>interaction: $F_{5,18}=1.78$ , NS             |
| Walking    | dose: $F_{5,18}=4.97$ , $p<0.05$<br>day: $F_{1,18}=28.26$ , $p<0.001$<br>interaction: $F_{5,18}=0.49$ , NS       |
| Grooming   | dose: $F_{5,18}=2.47$ , NS<br>day: $F_{1,18}=56.07$ , $p<0.001$<br>interaction: $F_{5,18}=5.35$ , $p<0.01$       |
| Motionless | dose: $F_{5,18}=5.40$ , $p<0.01$<br>day: $F_{1,18}=41.82$ , $p<0.001$<br>interaction: $F_{5,18}=4.56$ , $p<0.01$ |

#### **Epoch 2 (45-75 minutes).**

|            |                                                                                                                  |
|------------|------------------------------------------------------------------------------------------------------------------|
| Sniffing   | dose: $F_{5,18}=4.40$ , $p<0.01$<br>day: $F_{1,18}=25.18$ , $p<0.001$<br>interaction: $F_{5,18}=2.04$ , NS       |
| Walking    | dose: $F_{5,18}=5.70$ , $p<0.01$<br>day: $F_{1,18}=21.43$ , $p<0.001$<br>interaction: $F_{5,18}=4.52$ , $p<0.01$ |
| Grooming   | dose: $F_{5,18}=3.65$ , $p<0.05$<br>day: $F_{1,18}=0.01$ , NS<br>interaction: $F_{5,18}=1.34$ , NS               |
| Motionless | dose: $F_{5,18}=2.65$ , NS<br>day: $F_{1,18}=20.24$ , $p<0.001$<br>interaction: $F_{5,18}=0.87$ , NS             |

### Epoch 3 (90-120 minutes).

Sniffing      dose:  $F_{5,18}=1.27$ , NS  
                  day:  $F_{1,18}=12.12$ ,  $p<0.01$   
                  interaction:  $F_{5,18}=0.81$ , NS

Walking      dose:  $F_{5,18}=1.42$ , NS  
                  day:  $F_{1,18}=4.78$ ,  $p<0.05$   
                  interaction:  $F_{5,18}=0.84$ , NS

Grooming     dose:  $F_{5,18}=2.50$ , NS  
                  day:  $F_{1,18}=2.00$ , NS  
                  interaction:  $F_{5,18}=2.27$ , NS

Motionless   dose:  $F_{5,18}=1.39$ , NS  
                  day:  $F_{1,18}=2.20$ , NS  
                  interaction:  $F_{5,18}=1.87$ , NS

### Reference

Kirk RE (1968) *Experimental Design: Procedures for the Behavioral Sciences*.  
Brooks/Cole, Pacific Grove, CA.
